# Supplementary material for: IL‐7 is expressed in malignant mesothelioma and has a prognostic value
Source: PubMed Central journal article supplement (PMC9580880; doi:10.1002/1878-0261.13310), 2022-09-10
Supplement: MOL2-16-3606-s001.pdf [file MOL2-16-3606-s001.pdf]

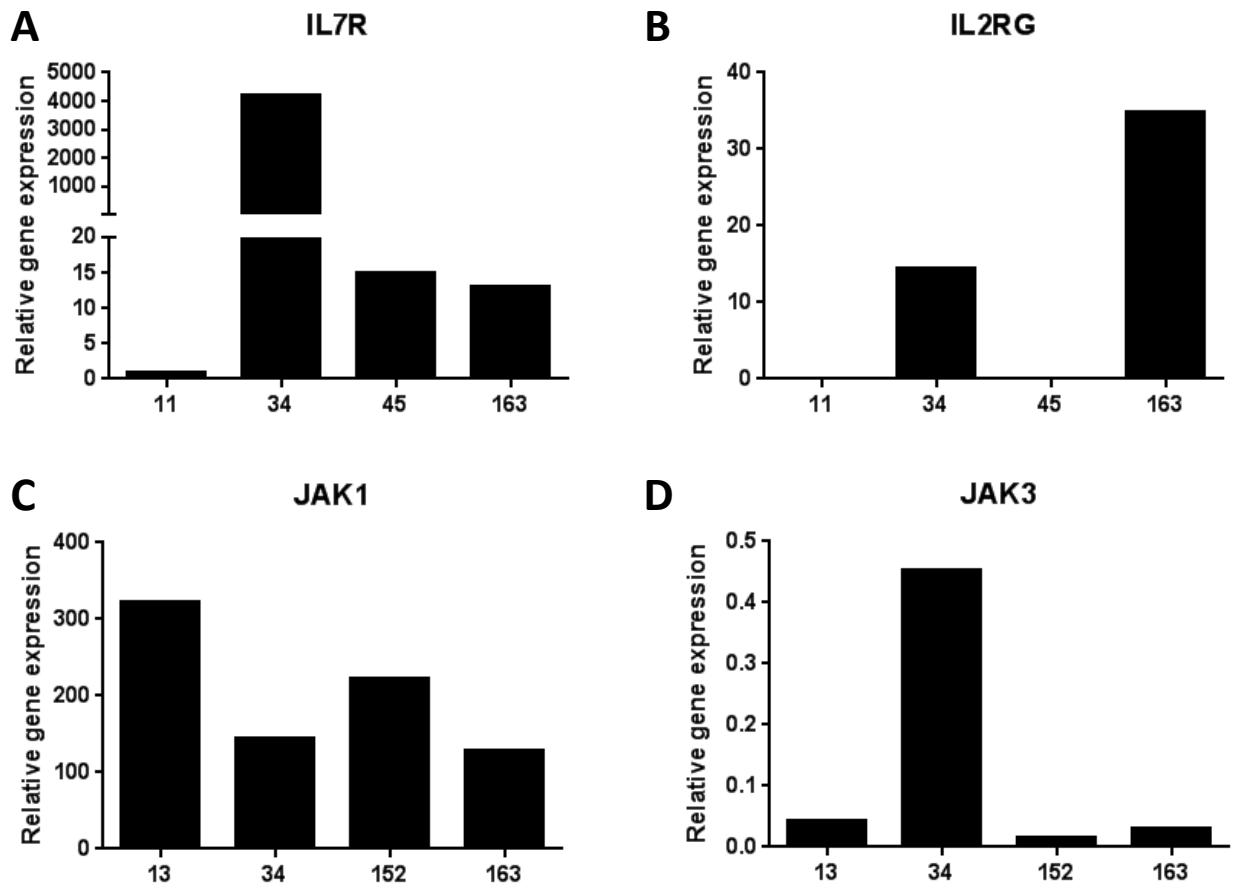

**Supplementary figure 3: Characteristic of cell lines used in figure 3.** *IL7R* (A), *IL2R* (B), *JAK1* (C) and *JAK3* (D) gene expressions were determined using RT-PCR in 4 MPM cell lines Meso 11, 34, 45, and 163. MPM, malignant pleural mesothelioma.
