# Supplementary material for: IL‐7 is expressed in malignant mesothelioma and has a prognostic value
Source: PubMed Central journal article supplement (PMC9580880; doi:10.1002/1878-0261.13310), 2022-09-10
Supplement: MOL2-16-3606-s007.pdf [file MOL2-16-3606-s007.pdf]

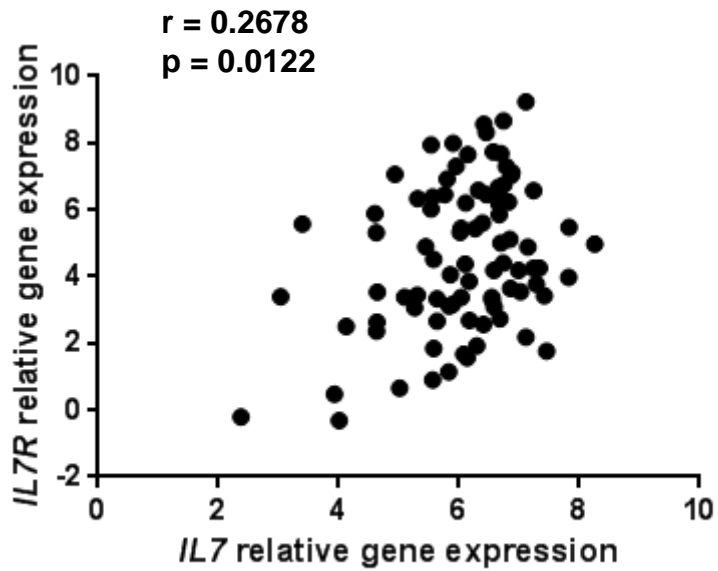

**Supplementary figure 7: Correlation between *IL7* and *IL7R* mRNA expression in MPM tumours.** RNASeq mRNA expression values were obtained from TCGA datasets. Correlation was analyzed using non-parametric Spearman test. MPM, malignant pleural mesothelioma; TCGA, the cancer genome atlas.
