# Supplementary material for: IL‐7 is expressed in malignant mesothelioma and has a prognostic value
Source: PubMed Central journal article supplement (PMC9580880; doi:10.1002/1878-0261.13310), 2022-09-10
Supplement: MOL2-16-3606-s009.pdf [file MOL2-16-3606-s009.pdf]

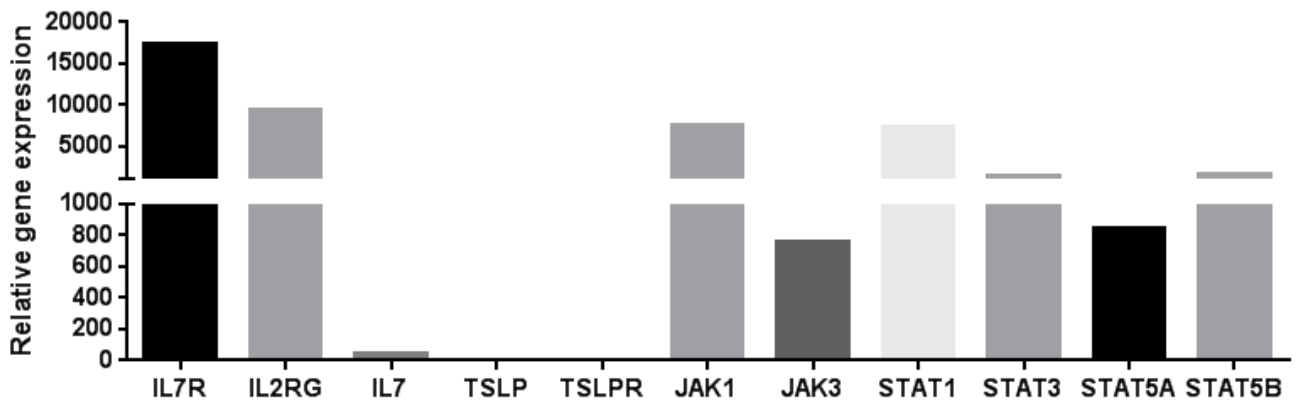

**Supplementary figure 4: Expression of genes involved in IL-7 signalling in PBMC.** PBMC were obtained from blood of healthy donor and isolated using Ficoll gradient. Gene mRNA expression was measured using RT-PCR. PBMC, peripheral blood mononuclear cells.
