# Supplementary material for: IL‐7 is expressed in malignant mesothelioma and has a prognostic value
Source: PubMed Central journal article supplement (PMC9580880; doi:10.1002/1878-0261.13310), 2022-09-10
Supplement: MOL2-16-3606-s013.pdf [file MOL2-16-3606-s013.pdf]

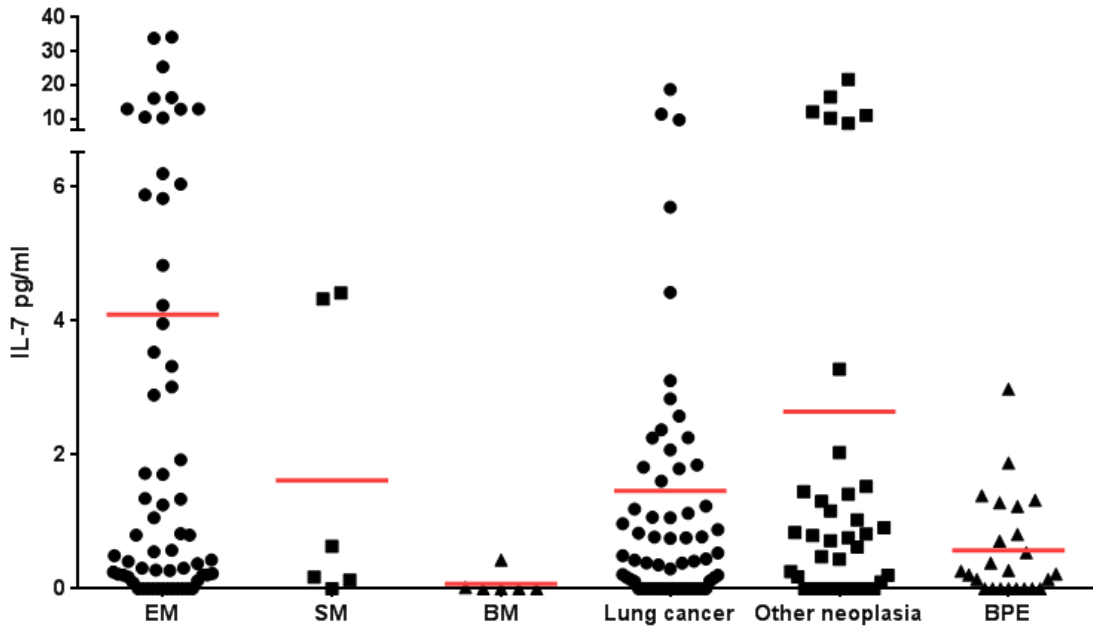

**Supplementary figure 9: Expression of IL-7 in pleural effusions of subgroups of patients.** IL-7 was measured using ELISA assay. Red bars correspond to mean values. EM, epithelioid mesothelioma; SM, sarcomatoid mesothelioma; BM, biphasic mesothelioma; BPE, benign pleural effusion.
