# Supplementary material for: IL‐7 is expressed in malignant mesothelioma and has a prognostic value
Source: PubMed Central journal article supplement (PMC9580880; doi:10.1002/1878-0261.13310), 2022-09-10
Supplement: MOL2-16-3606-s014.pdf [file MOL2-16-3606-s014.pdf]

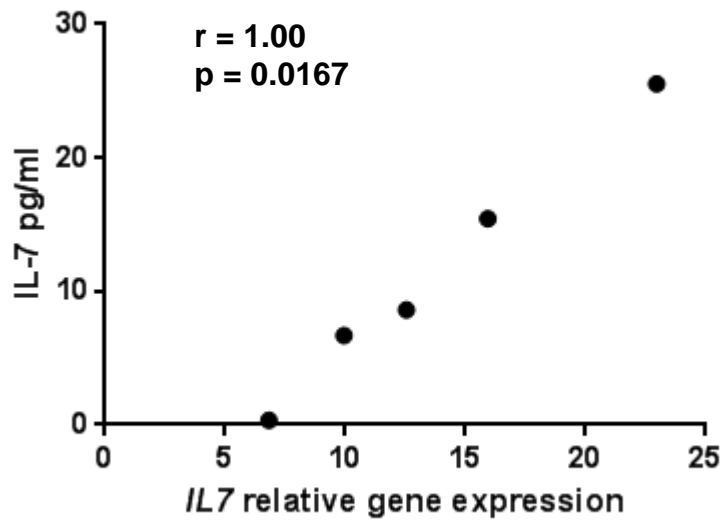

**Supplementary figure 1: Correlation between *IL7* mRNA expression and secretion in MPM cells.** mRNA expression was measured using RT-PCR and IL-7 secretion was determined using ELISA assay. MPM, malignant pleural mesothelioma.
